# Supplementary material for: Phytotherapy and Dietotherapy of COVID-19—An Online Survey Results from Central Part of Balkan Peninsula
Source: MDPI journal article supplement (doi:10.3390/healthcare10091678), 2022-09-02
Supplement: s1 [file s1]

The results of association rules technique application on dataset describing:

- a) patterns of medicinal plants application (min. support = 15.0%, min. confidence = 15.0%, min. correlation = 50.0%; max. size of body = 10, max. size of head = 10).

| Body              | ==> | Head              | Support (%) | Confidence (%) | Correlation (%) |
|-------------------|-----|-------------------|-------------|----------------|-----------------|
| chamomile         | ==> | mint              | 24.75       | 61.49          | 63.92           |
| mint              | ==> | chamomile         | 24.75       | 66.443         | 63.92           |
| garlic            | ==> | ginger            | 32.50       | 55.32          | 61.52           |
| ginger            | ==> | garlic            | 32.50       | 68.42          | 61.52           |
| garlic            | ==> | cinnamon          | 24.25       | 8              | 57.76           |
| cinnamon          | ==> | garlic            | 24.25       | 80.83          | 57.76           |
| mint              | ==> | garlic, chamomile | 17.25       | 46.31          | 55.16           |
| garlic, chamomile | ==> | mint              | 17.25       | 65.71          | 55.16           |
| chamomile         | ==> | garlic, mint      | 17.25       | 42.86          | 54.11           |
| garlic, mint      | ==> | chamomile         | 17.25       | 68.32          | 54.11           |
| garlic            | ==> | chamomile         | 26.25       | 44.69          | 53.98           |
| chamomile         | ==> | garlic            | 26.25       | 65.22          | 53.98           |
| garlic            | ==> | mint              | 25.25       | 42.98          | 53.97           |
| mint              | ==> | garlic            | 25.25       | 67.78          | 53.97           |
| ginger            | ==> | cinnamon          | 19.25       | 40.53          | 50.99           |
| cinnamon          | ==> | ginger            | 19.25       | 64.17          | 50.99           |
| garlic            | ==> | oregano           | 19.00       | 32.34          | 50.08           |
| oregano           | ==> | garlic            | 19.00       | 77.55          | 50.08           |

- b) patterns of non-herbal dietary supplements application (min. support = 25.0%, min. confidence = 25.0%, min. correlation = 60.0%; max. size of body = 10, max. size of head = 10)

| Body                 | ==> | Head                 | Support (%) | Confidence (%) | Correlation (%) |
|----------------------|-----|----------------------|-------------|----------------|-----------------|
| vitamin C            | ==> | zinc                 | 63.91       | 74.17          | 81.19           |
| zinc                 | ==> | vitamin C            | 63.91       | 88.88          | 81.19           |
| vitamin C            | ==> | vitamin D            | 46.93       | 54.47          | 70.16           |
| vitamin D            | ==> | vitamin C            | 46.93       | 90.38          | 70.16           |
| zinc                 | ==> | vitamin D            | 40.94       | 56.94          | 67.00           |
| vitamin D            | ==> | zinc                 | 40.94       | 78.84          | 67.00           |
| vitamin D            | ==> | vitamin C, zinc      | 37.94       | 73.07          | 65.87           |
| vitamin C, zinc      | ==> | vitamin D            | 37.94       | 59.37          | 65.87           |
| vitamin C            | ==> | magnesium            | 40.37       | 46.85          | 65.40           |
| magnesium            | ==> | vitamin C            | 40.37       | 91.29          | 65.40           |
| zinc                 | ==> | vitamin C, vitamin D | 37.94       | 52.77          | 65.32           |
| vitamin C, vitamin D | ==> | zinc                 | 37.94       | 80.85          | 65.32           |
| vitamin C            | ==> | zinc, vitamin D      | 37.94       | 44.03          | 63.88           |
| zinc, vitamin D      | ==> | vitamin C            | 37.94       | 92.68          | 63.88           |
| magnesium            | ==> | zinc                 | 33.95       | 76.77          | 60.21           |
| zinc                 | ==> | magnesium            | 33.95       | 47.22          | 60.21           |

- c) patterns of combined application of medicinal plants and non-herbal dietary supplements (min. support = 15.0%, min. confidence = 15.0%, min. correlation = 70.0%; max. size of body = 10, max. size of head = 10)

| Body                 | ==> | Head                 | Support (%) | Confidence (%) | Correlation (%) |
|----------------------|-----|----------------------|-------------|----------------|-----------------|
| vitamin C            | ==> | zinc                 | 68.75       | 78.17          | 83.41           |
| zinc                 | ==> | vitamin C            | 68.75       | 89.01          | 83.41           |
| vitamin C            | ==> | vitamin D            | 56.69       | 64.46          | 77.02           |
| vitamin D            | ==> | vitamin C            | 56.69       | 92.02          | 77.02           |
| vitamin D            | ==> | zinc                 | 52.23       | 84.78          | 75.72           |
| zinc                 | ==> | vitamin D            | 52.23       | 67.63          | 75.72           |
| vitamin D            | ==> | vitamin C, zinc      | 48.66       | 78.98          | 74.76           |
| vitamin C, zinc      | ==> | vitamin D            | 48.66       | 70.77          | 74.76           |
| zinc                 | ==> | vitamin C, vitamin D | 48.66       | 63.00          | 73.53           |
| vitamin C, vitamin D | ==> | zinc                 | 48.66       | 85.82          | 73.53           |
| vitamin C            | ==> | vitamin D, zinc      | 48.66       | 55.32          | 71.79           |
| vitamin D, zinc      | ==> | vitamin C            | 48.66       | 93.16          | 71.79           |
| vitamin C            | ==> | garlic               | 50.89       | 57.86          | 71.23           |
| garlic               | ==> | vitamin C            | 50.89       | 87.69          | 71.23           |
| chamomile            | ==> | mint                 | 28.57       | 65.30          | 70.12           |
| mint                 | ==> | chamomile            | 28.57       | 75.29          | 70.12           |
